# Supplementary material
Source: publisher figshare collection journal article supplement (https://rs.figshare.com/ndownloader/files/24529960)
Supplement: Supplementary file [file 24529960]

# **Social status and ejaculate composition in the house mouse**

Helen L. Bayram, Catarina Franco, Philip Brownridge, Amy J. Claydon,  
Natalie Koch, Jane L. Hurst, Robert J. Beynon, Paula Stockley

## **Supplementary information**

### **Figure S1. Scent marks and social status**

Typical scent marking patterns from (a) dominant and (b) subordinate male house mice.

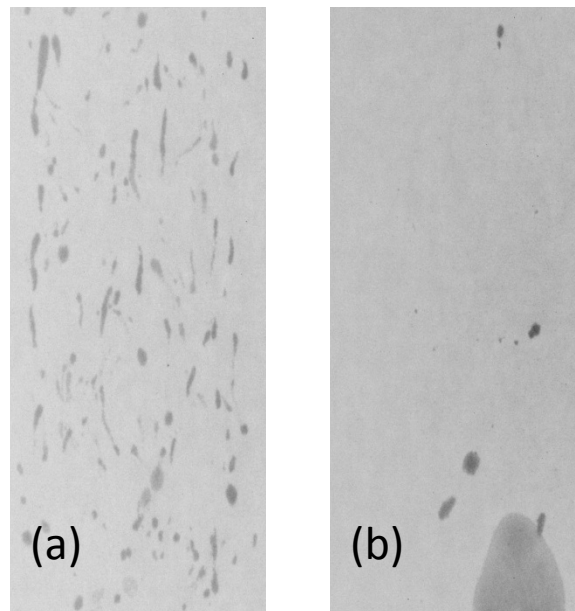

**Table S1.** Comparison of male reproductive traits according to social status. Differences between dominant and subordinate males are tested with paired t-tests. Comparisons of control and dominant or subordinate males are reported using mixed models with litter included as a random factor (see methods). Additional analyses test for differences in residual testes, epididymides and seminal vesicles masses, to compare results with control for variation in body mass.

| Reproductive trait                         | Dominant |      | Subordinate |      | Control |      | Dominant v. Subordinate |          |              | Control v. Dominant |          |              | Control v. Subordinate |          |              |
|--------------------------------------------|----------|------|-------------|------|---------|------|-------------------------|----------|--------------|---------------------|----------|--------------|------------------------|----------|--------------|
|                                            | Mean     | s.e. | Mean        | s.e. | Mean    | s.e. | df                      | <i>t</i> | <i>P</i>     | df                  | <i>t</i> | <i>P</i>     | df                     | <i>t</i> | <i>P</i>     |
| Body mass (g)                              | 21.81    | 0.98 | 21.24       | 1.09 | 20.74   | 0.77 | 7                       | 0.54     | 0.603        | 15                  | -0.8     | 0.454        | 15                     | 0.05     | 0.960        |
| Preputial glands (mg)                      | 90       | 13   | 56          | 10   | 70.25   | 16.7 | 7                       | 2.93     | <b>0.022</b> | 15                  | -1.9     | 0.085        | 15                     | 1.64     | 0.122        |
| Epididymal sperm count (x10 <sup>6</sup> ) | 13.1     | 1.03 | 7.89        | 0.7  | 10      | 0.55 | 7                       | 4.28     | <b>0.004</b> | 15                  | -4.6     | <b>0.000</b> | 15                     | 3.92     | <b>0.001</b> |
| Testes (mg)                                | 181.6    | 6.23 | 183.4       | 9.69 | 180     | 5.81 | 7                       | -0.1     | 0.896        | 15                  | 0        | 0.993        | 15                     | -0.3     | 0.754        |
| - with control for body mass               |          |      |             |      |         |      | 7                       | -0.47    | 0.652        | 15                  | 0.55     | 0.589        | 15                     | -0.51    | 0.620        |
| Epididymides (mg)                          | 62.75    | 1.64 | 60          | 2.66 | 58.88   | 1.91 | 7                       | 0.87     | 0.415        | 15                  | -1.3     | 0.221        | 15                     | 0.31     | 0.758        |
| - with control for body mass               |          |      |             |      |         |      | 7                       | 0.84     | 0.430        | 15                  | -1.07    | 0.301        | 15                     | 0.32     | 0.752        |
| Seminal vesicles (mg)                      | 119.3    | 10.7 | 93          | 8.03 | 103     | 6.33 | 7                       | 2.62     | <b>0.034</b> | 15                  | -2.40    | <b>0.003</b> | 15                     | 1.78     | 0.095        |
| - with control for body mass               |          |      |             |      |         |      | 7                       | 3.71     | <b>0.008</b> | 15                  | -2.91    | <b>0.011</b> | 15                     | 2.27     | <b>0.038</b> |
